# Supplementary material for: Effects and safety of oral tolvaptan in patients with congestive heart failure: A systematic review and network meta-analysis
Source: PubMed Central journal article supplement (PMC5595312; doi:10.1371/journal.pone.0184380), 2017-09-12
Supplement: pone.0184380.s003.pdf [file pone.0184380.s003.pdf]

## Supporting Information (S3 Fig)

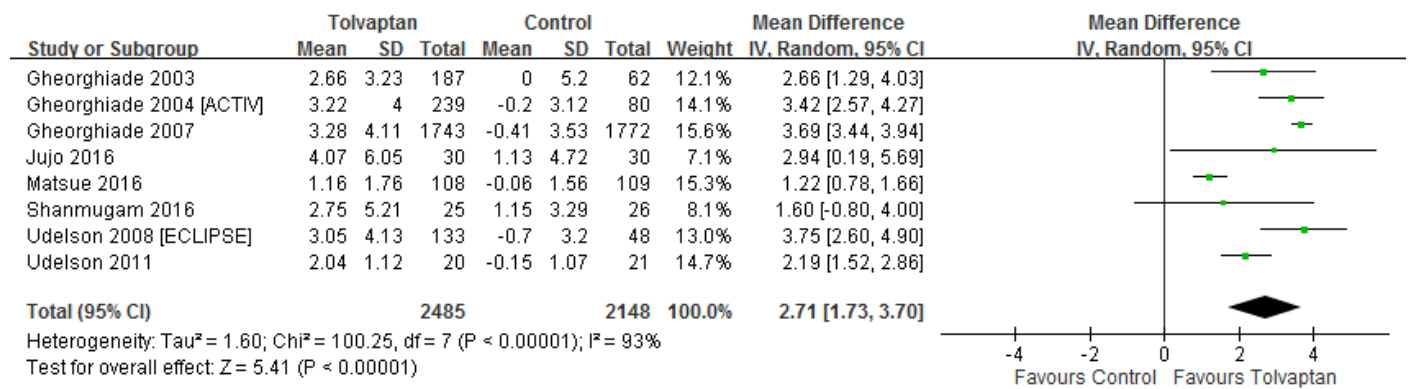

**S3 Fig. Forest plot of direct comparison: Tolvaptan versus Control.** Efficacy outcome: change of serum sodium at 24-hr
