# Supplementary material for: Effects and safety of oral tolvaptan in patients with congestive heart failure: A systematic review and network meta-analysis
Source: PubMed Central journal article supplement (PMC5595312; doi:10.1371/journal.pone.0184380), 2017-09-12
Supplement: pone.0184380.s004.pdf [file pone.0184380.s004.pdf]

## Supporting Information (S4 Fig)

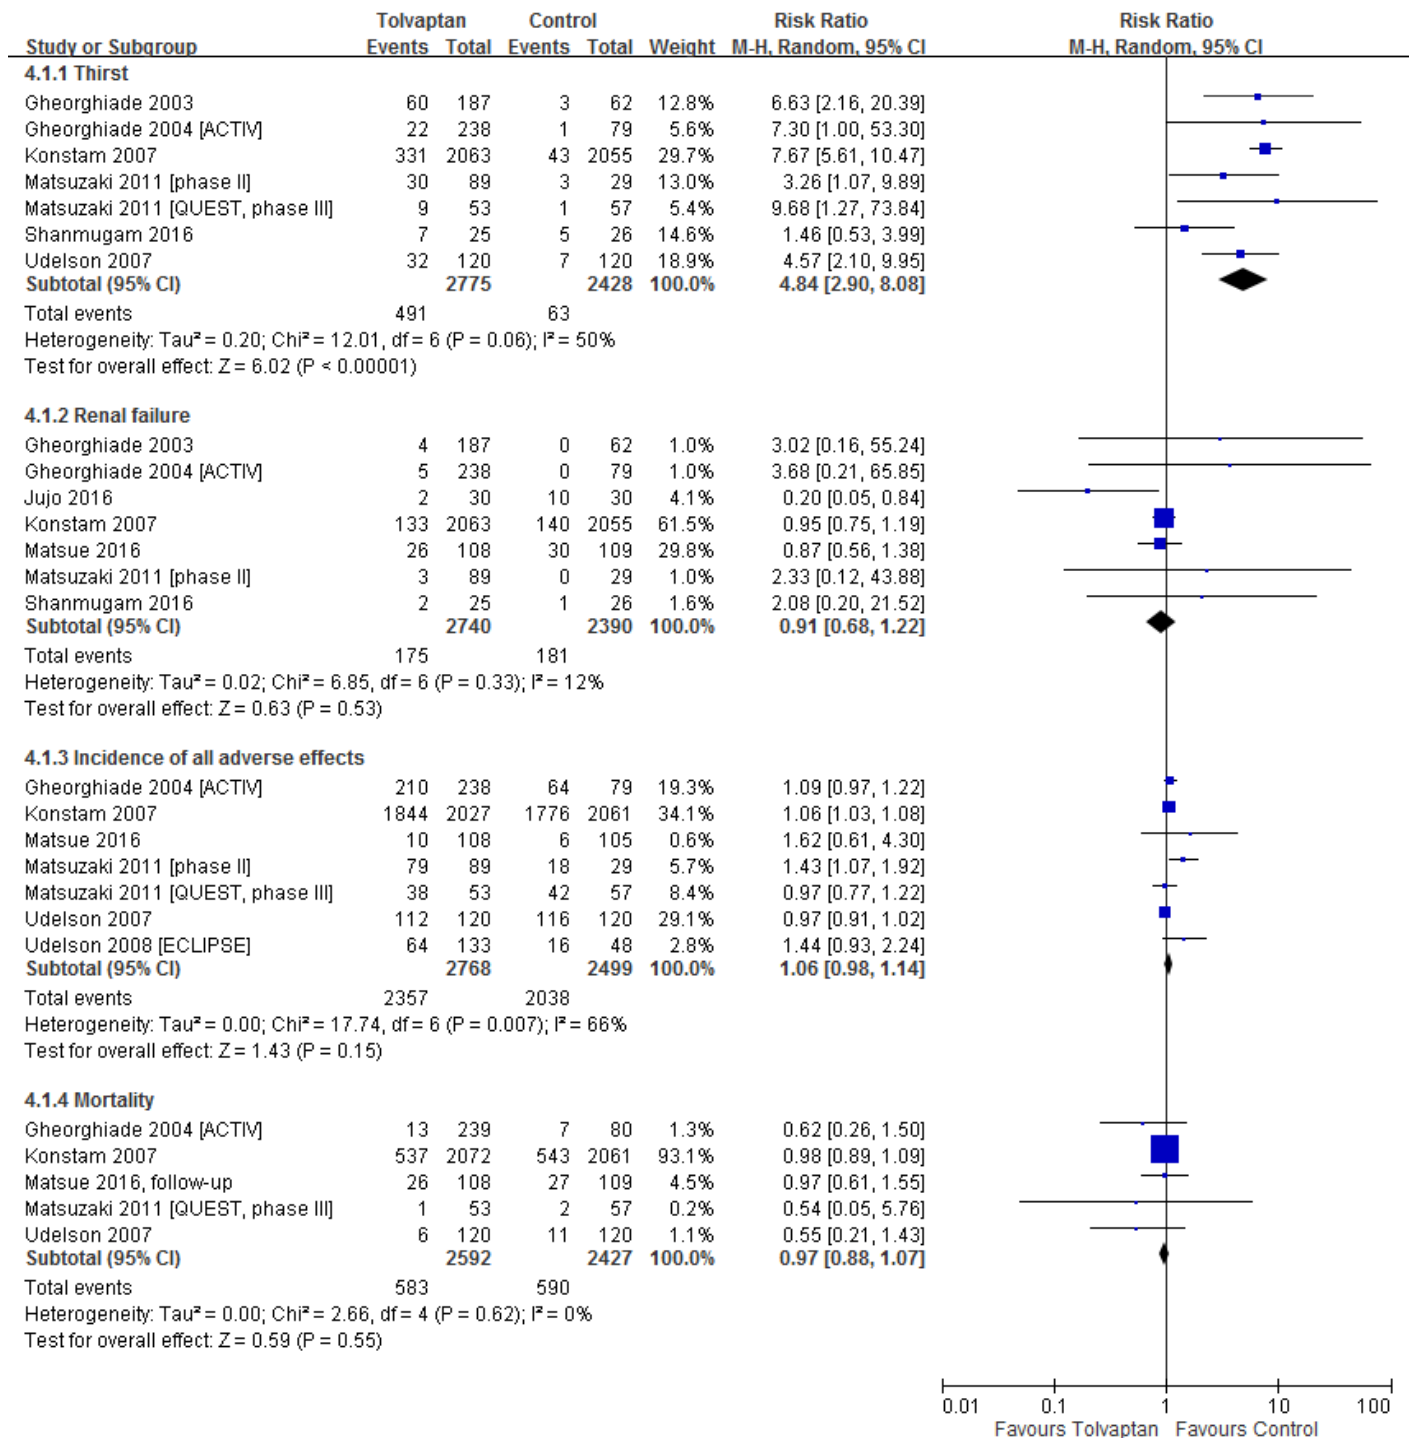

**S4 Fig. Forest plot of direct comparison: Tolvaptan versus Control.** Main secondary outcomes: 4.1.1 Thirst/ 4.1.2 Renal failure/ 4.1.3 Incidence of all adverse effects/ 4.1.4 Mortality
