# Supplementary material for: Effects and safety of oral tolvaptan in patients with congestive heart failure: A systematic review and network meta-analysis
Source: PubMed Central journal article supplement (PMC5595312; doi:10.1371/journal.pone.0184380), 2017-09-12
Supplement: pone.0184380.s005.pdf [file pone.0184380.s005.pdf]

## Supporting Information (S5 Fig)

### (A) Mortality

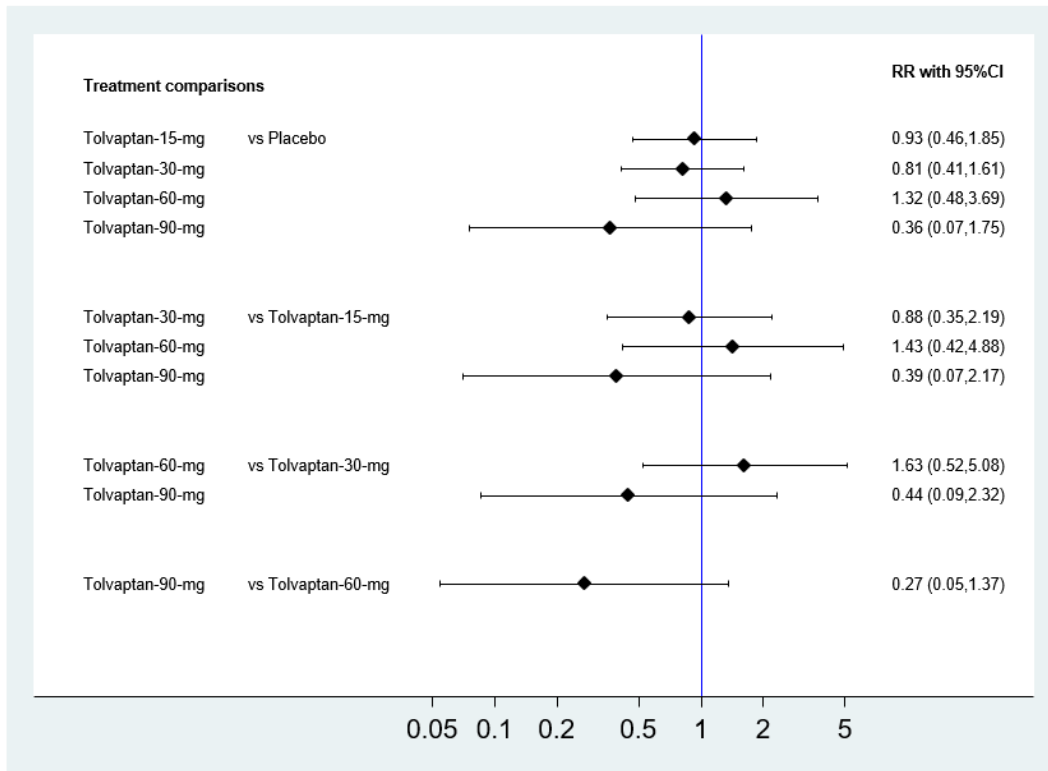

### (B) Thirst

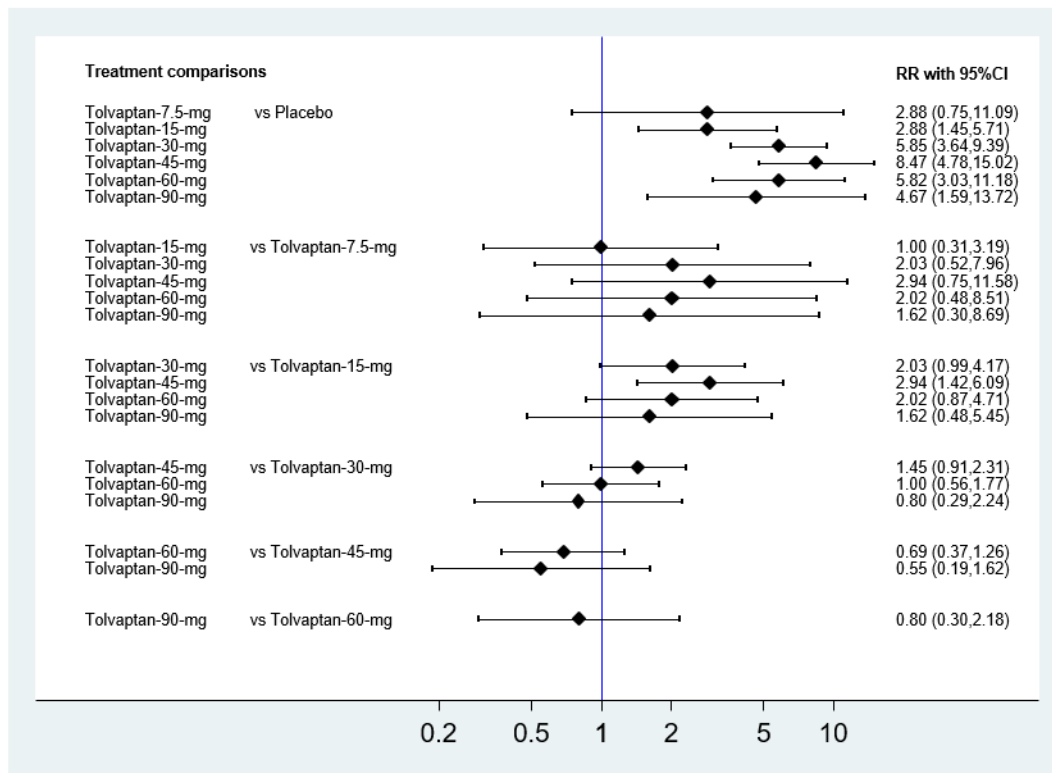

(C) Renal failure

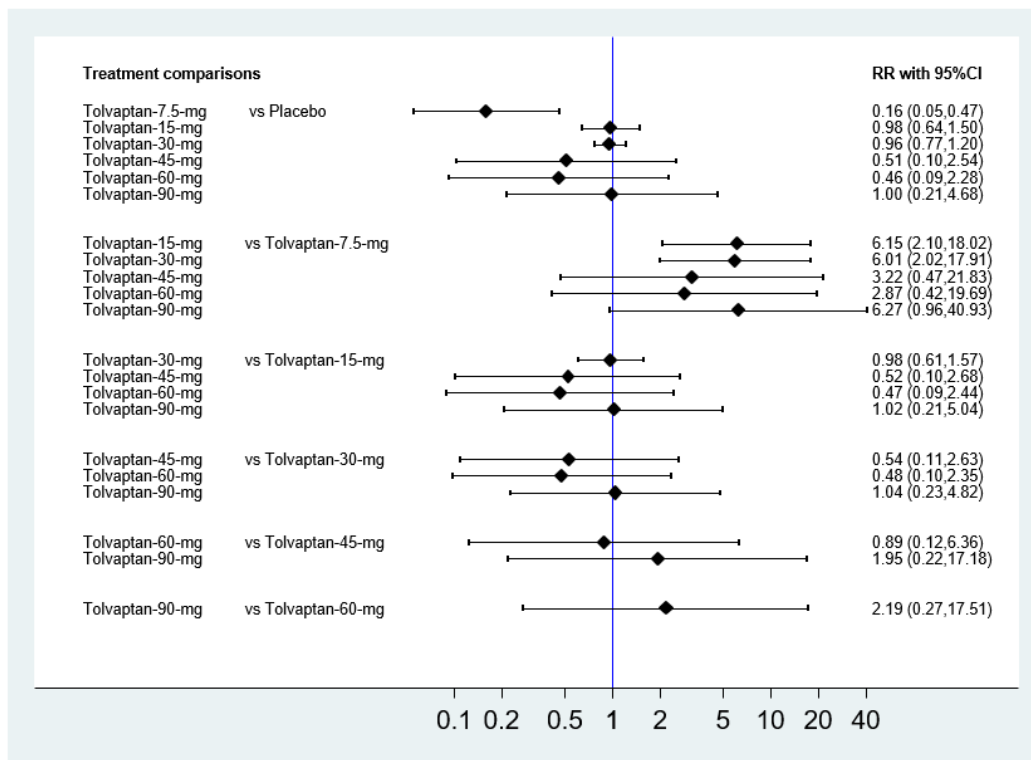

(D) Incidence of all adverse effects

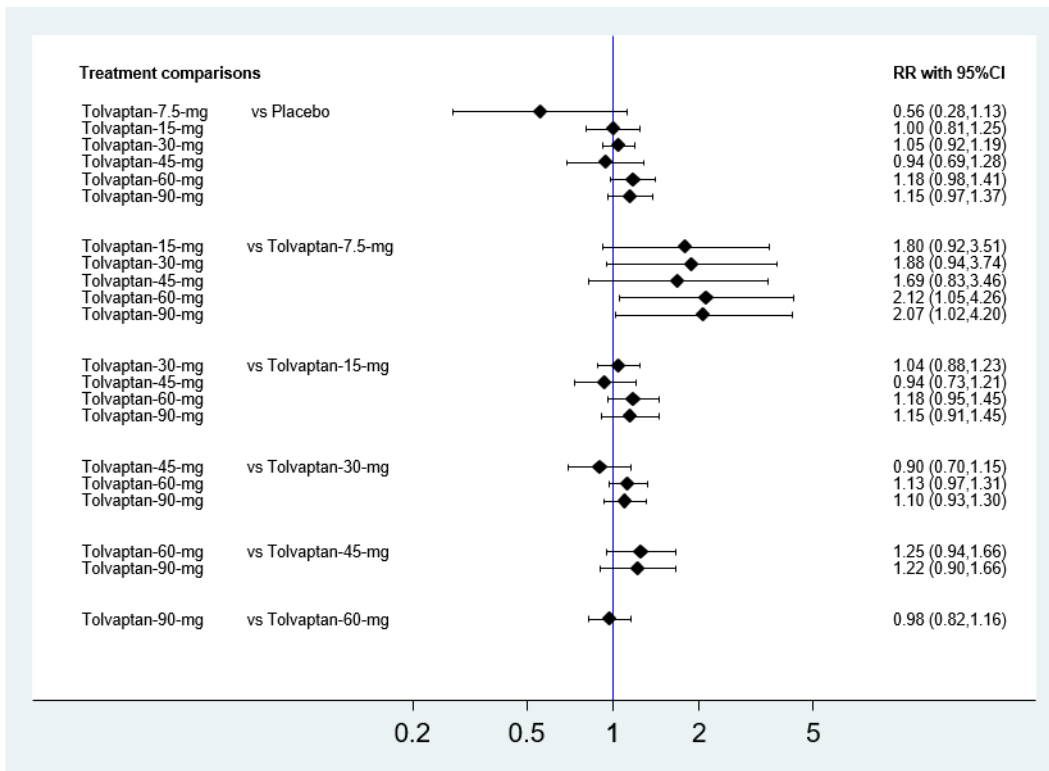

S5 Fig. Main secondary outcomes of thirst, renal failure, incidence of all adverse effects and mortality
