# Supplementary material for: Effects and safety of oral tolvaptan in patients with congestive heart failure: A systematic review and network meta-analysis
Source: PubMed Central journal article supplement (PMC5595312; doi:10.1371/journal.pone.0184380), 2017-09-12
Supplement: pone.0184380.s006.pdf [file pone.0184380.s006.pdf]

## Supporting Information (S6 Fig)

### (A) Urine output

|                 | Ranking (mean) | SUCRA |
|-----------------|----------------|-------|
| Placebo         | 6.4            | 0.1   |
| Tolvaptan 7.5mg | 6.5            | 0.1   |
| Tolvaptan 15mg  | 5              | 0.3   |
| Tolvaptan 30mg  | 2.8            | 0.7   |
| Tolvaptan 45mg  | 2.7            | 0.7   |
| Tolvaptan 60mg  | 1.8            | 0.9   |
| Tolvaptan 90mg  | 2.9            | 0.7   |

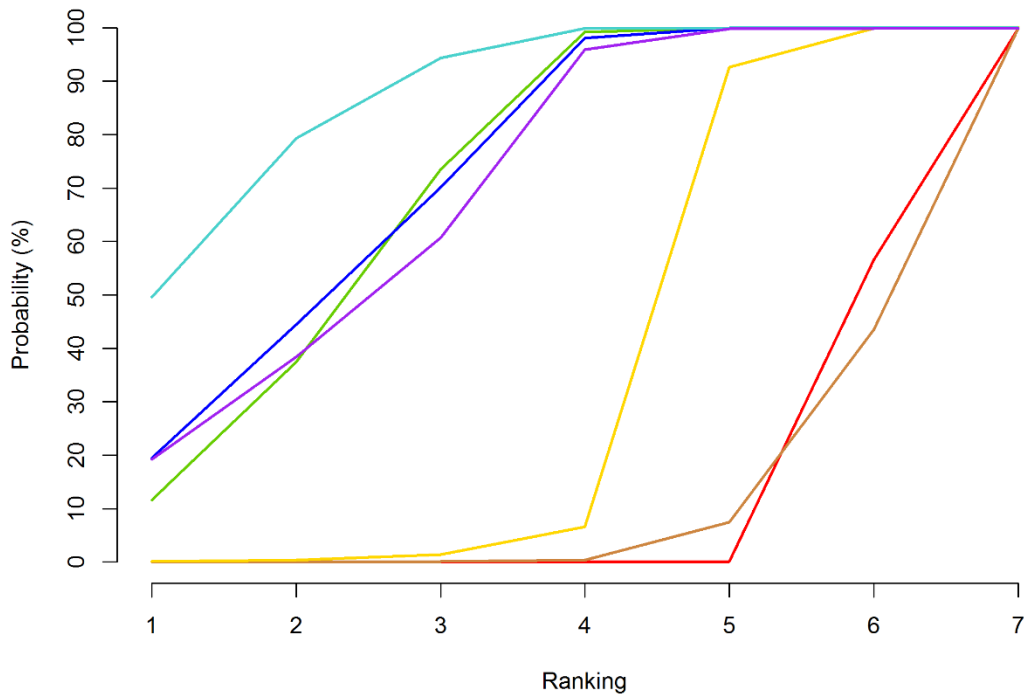

(B) Body weight change

|                   | Ranking (mean) | SUCRA |
|-------------------|----------------|-------|
| — Placebo         | 6.2            | 0.1   |
| — Tolvaptan 7.5mg | 6.8            | 0     |
| — Tolvaptan 15mg  | 5              | 0.3   |
| — Tolvaptan 30mg  | 4              | 0.5   |
| — Tolvaptan 45mg  | 2.2            | 0.8   |
| — Tolvaptan 60mg  | 2.3            | 0.8   |
| — Tolvaptan 90mg  | 1.6            | 0.9   |

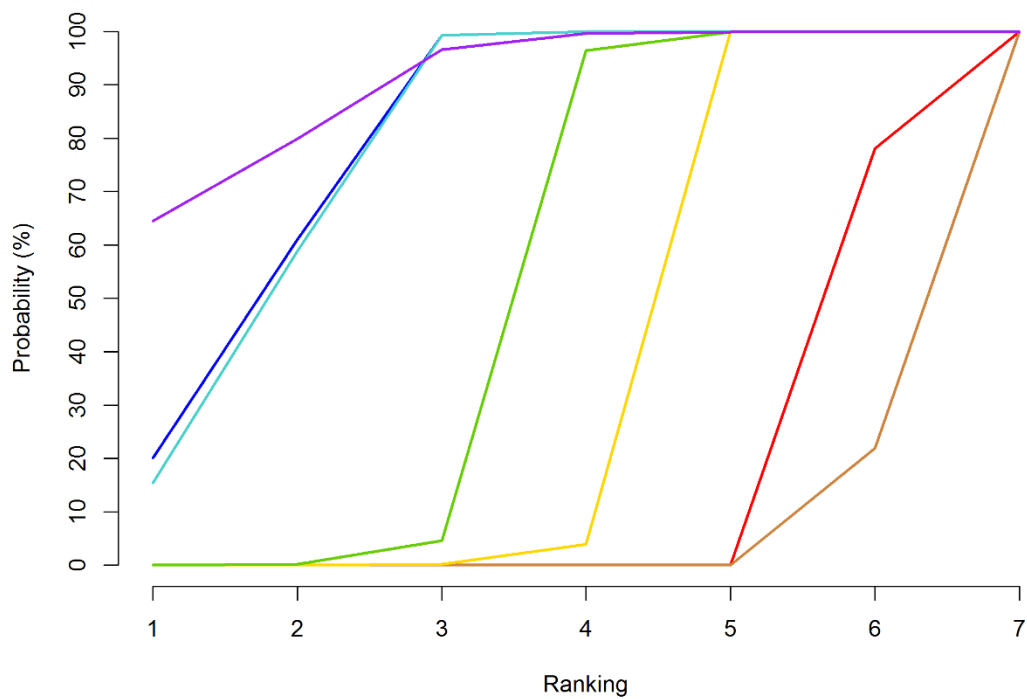

(C) Change of serum sodium

|                 | Ranking (mean) | SUCRA |
|-----------------|----------------|-------|
| Placebo         | 7              | 0     |
| Tolvaptan 7.5mg | 3.8            | 0.5   |
| Tolvaptan 15mg  | 5.9            | 0.2   |
| Tolvaptan 30mg  | 4.2            | 0.5   |
| Tolvaptan 45mg  | 2.5            | 0.7   |
| Tolvaptan 60mg  | 2.1            | 0.8   |
| Tolvaptan 90mg  | 2.5            | 0.7   |

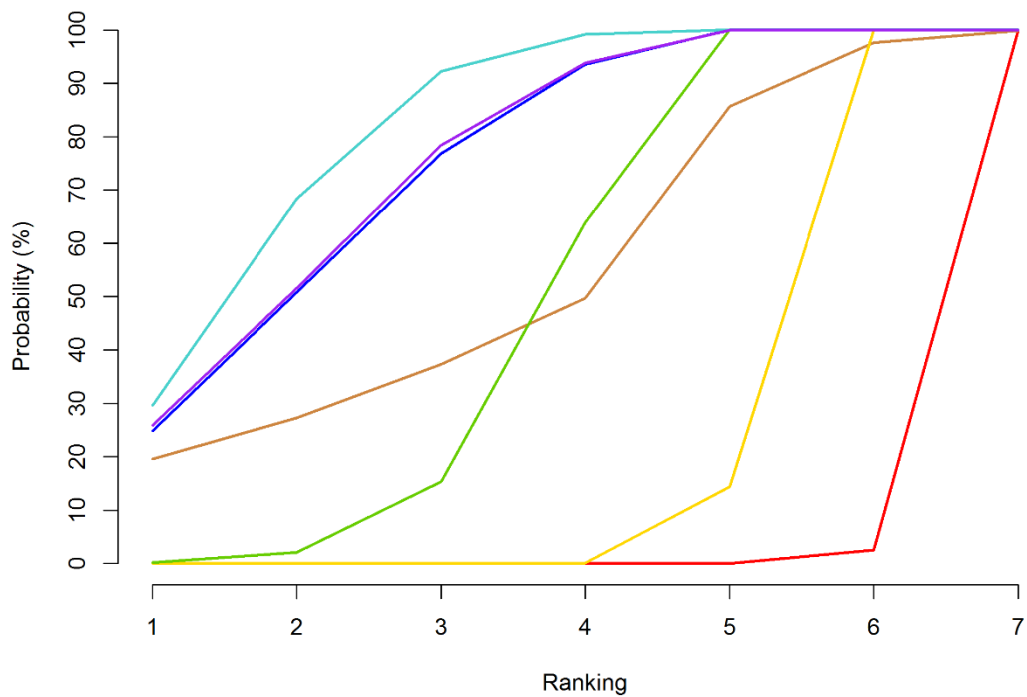

(D) Mortality

|                  | Ranking (mean) | SUCRA |
|------------------|----------------|-------|
| — Placebo        | 3.5            | 0.4   |
| — Tolvaptan 15mg | 3.2            | 0.5   |
| — Tolvaptan 30mg | 2.7            | 0.6   |
| — Tolvaptan 60mg | 4.2            | 0.2   |
| — Tolvaptan 90mg | 1.5            | 0.9   |

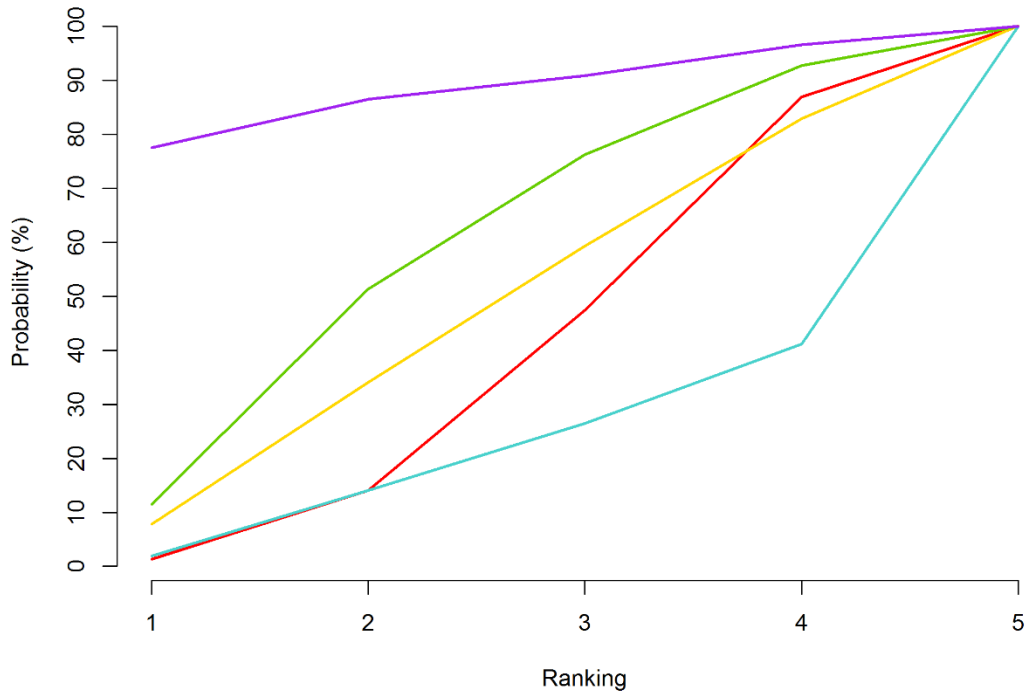

(E) Thirsty

|                   | Ranking (mean) | SUCRA |
|-------------------|----------------|-------|
| — Placebo         | 1.1            | 1     |
| — Tolvaptan 7.5mg | 3.2            | 0.6   |
| — Tolvaptan 15mg  | 2.8            | 0.7   |
| — Tolvaptan 30mg  | 5              | 0.3   |
| — Tolvaptan 45mg  | 6.8            | 0     |
| — Tolvaptan 60mg  | 5              | 0.3   |
| — Tolvaptan 90mg  | 4.2            | 0.5   |

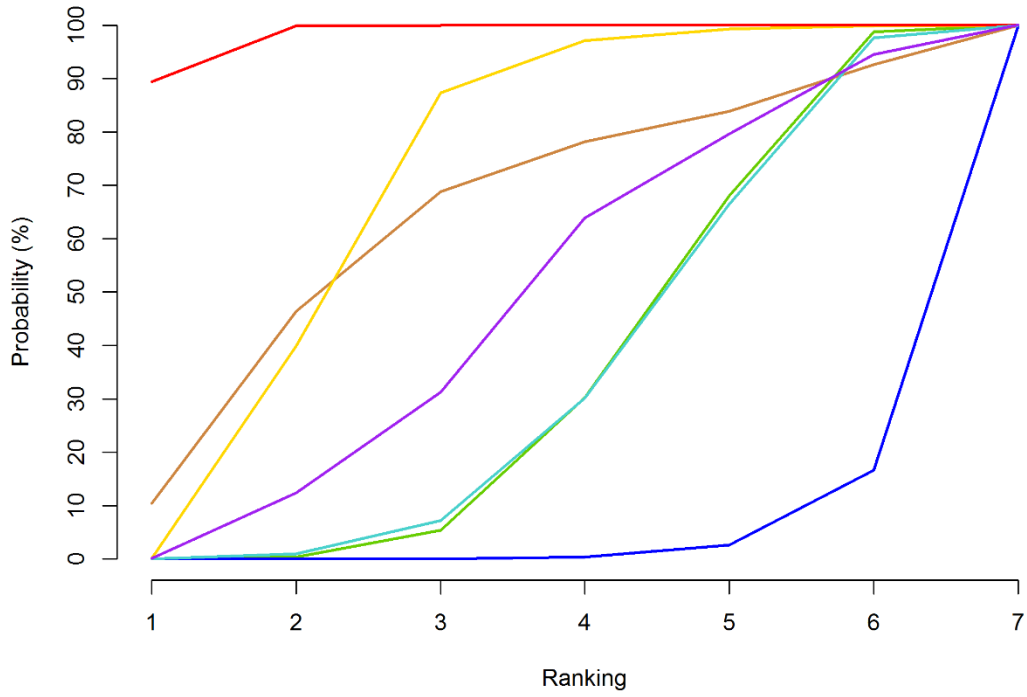

(F) Renal failure

|                 | Ranking (mean) | SUCRA |
|-----------------|----------------|-------|
| Placebo         | 5.3            | 0.3   |
| Tolvaptan 7.5mg | 1.3            | 1     |
| Tolvaptan 15mg  | 5.1            | 0.3   |
| Tolvaptan 30mg  | 4.9            | 0.3   |
| Tolvaptan 45mg  | 3.3            | 0.6   |
| Tolvaptan 60mg  | 3.1            | 0.7   |
| Tolvaptan 90mg  | 5              | 0.3   |

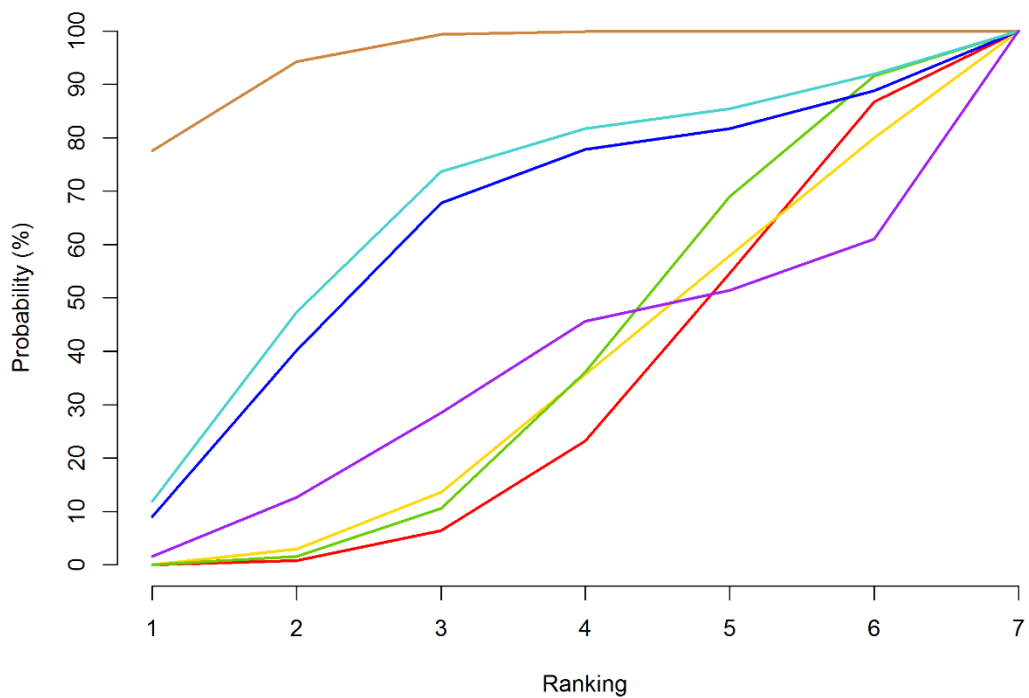

(G) Incidence of all adverse effects

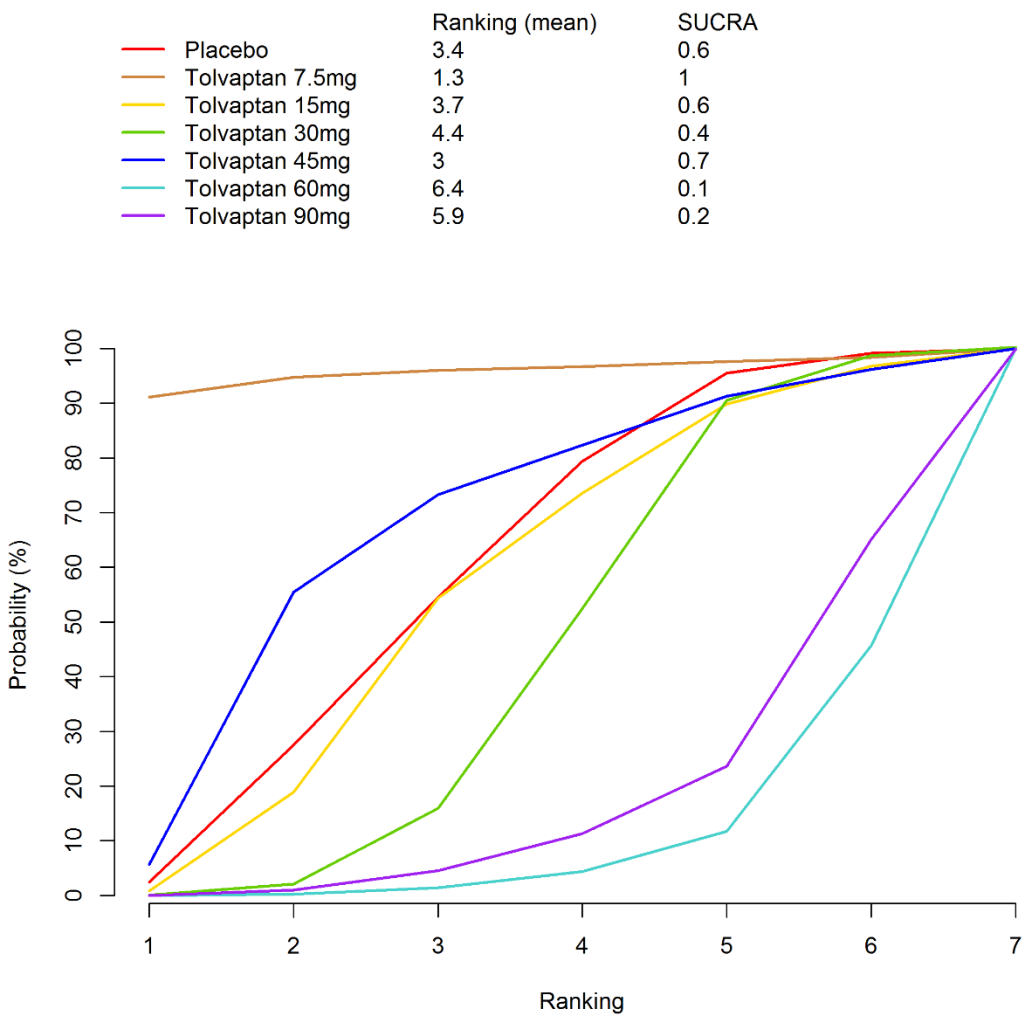

**S6 Fig. Ranking Probability of Strategies and Surface under the Cumulative Curve in the Network Meta-analysis of tolvaptan dosage strategies for CHF patients**
